# Supplementary material for: First report of microplastics in the gastrointestinal tracts of North American insectivorous bats
Source: PeerJ. 2025 Jul 25;13:e19740. doi: 10.7717/peerj.19740 (PMC12302965; doi:10.7717/peerj.19740)
Supplement: Supplemental Information 1 — Each sample used in the analysis, including number of microplastics, bat mass (g), bat forearm length (mm), bat sex, collection county, and collection month. [file peerj-13-19740-s001.xlsx]

## Sheet: EPFU.R.dat
BatID	Species	County	SampleType	Sex	Age	BatMass	SampleMass	Right FA	Date Collected	Date Digested	KOH Used (g)	SampleandKOHMass	MPCount	MP/GRAM Tissue	MPConc
EPFU_12_GI	EPFU	KNOX	GI	M	J	16.805	1.37	42.5	2020-05-01	2022-01-27	4.11	5.48	23	16.7883	4.19708
EPFU_13_GI	EPFU	HAMILTON	GI	F	J	12.656	0.78	47.5	2020-06-25	2022-01-27	2.34	3.12	1	1.28205	0.320513
EPFU_15_GI	EPFU	HAMILTON	GI	F	U	17.86	1.26	44	2020-06-23	2022-01-27	3.78	5.04	13	10.3175	2.57937
BLANK_10	BLANK	BLANK	BLANK	BLANK	BLANK					2022-01-27	2.96	2.96	4		1.35135
BLANK_11	BLANK	BLANK	BLANK	BLANK	BLANK					2022-01-27	2.96	2.96	6		2.02703
EPFU_85_GI	EPFU	KNOX	GI	F	J	12.3	0.6	47	2019-07-26	2022-02-07	1.8	2.4	34	56.6667	14.1667
EPFU_06_GI	EPFU	SEVIER	GI	F	J	7.85	0.6584	38.5	2020-06-22	2022-02-07	1.97	2.6284	17	25.8202	6.46781
EPFU_89_GI	EPFU	BENTON	GI	F	A	12.41	0.8845	49	2020-09-04	2022-02-07	2.6535	3.538	21	23.7422	5.93556
BLANK_12	BLANK	BLANK	BLANK	BLANK	BLANK					2022-02-07	1.624	1.624	2		1.23153
BLANK_13	BLANK	BLANK	BLANK	BLANK	BLANK					2022-02-07	1.624	1.624	1		0.615764
EPFU_55_GI	EPFU	SULLIVAN	GI	F	J	14.4	0.6587	47	2020-11-13	2022-02-21	1.976	2.6347	15	22.7721	5.69325
EPFU_45_GI	EPFU	SULLIVAN	GI	M	A	17.5	1.0472	45.5	2020-11-05	2022-02-21	3.1416	4.1888	24	22.9183	5.72956
EPFU_87_GI	EPFU	RUTHERFORD	GI	M	A	22.7	1.3893	50	2020-11-21	2022-02-21	4.1679	5.5572	7	5.03851	1.25963
EPFU_18_GI	EPFU	WHITE	GI	M	A	10.055	0.5227	40.5	2019-05-01	2022-02-21	1.5681	2.0908	112	214.272	53.568
BLANK_14	BLANK	BLANK	BLANK	BLANK	BLANK					2022-02-21	1.9617	1.9617	2		1.01952
BLANK_15	BLANK	BLANK	BLANK	BLANK	BLANK					2022-02-21	2.5517	2.5517	5		1.95948
EPFU_32_GI	EPFU	HAMILTON	GI	F	A	18.4	2.4259	50	2019-05-08	2022-03-03	7.2777	9.7036	4	1.64887	0.412218
EPFU_43_GI	EPFU	ANDERSON	GI	F	A	14	0.9823	48	2020-08-18	2022-03-03	2.9469	3.9292	21	21.3784	5.3446
EPFU_66_GI	EPFU	GREENE	GI	M	A	13	1.5252	50	2019-04-29	2022-03-03	4.5756	6.1008	4	2.62261	0.655652
EPFU_57_GI	EPFU	HAMILTON	GI	F	A	20.1	2.9272	48	2019-05-08	2022-03-03	8.7816	11.7088	3	1.02487	0.256218
EPFU_67_GI	EPFU	KNOX	GI	F	A	11.5	0.2734	50	2019-08-11	2022-03-03	0.8202	1.0936	6	21.9459	5.48647
EPFU_86_GI	EPFU	PERRY	GI	M	J	13.063	0.9538	45	2020-08-20	2022-03-03	2.8614	3.8152	10	10.4844	2.62109
BLANK_16	BLANK	BLANK	BLANK	BLANK	BLANK					2022-03-03	2.579	2.579	1		0.387747
BLANK_17	BLANK	BLANK	BLANK	BLANK	BLANK					2022-03-03	2.579	2.579	2		0.775494
EPFU_93_GI	EPFU	DAVIDSON	GI	F	A	20.207	1.4714	51	2020-07-20	2022-03-11	4.4373	5.9087	6	4.07775	1.01545
EPFU_07_GI	EPFU	ANDERSON	GI	M	A	11.1919	0.7062	46	2020-05-05	2022-03-11	2.1186	2.8248	60	84.9618	21.2404
EPFU_54_GI	EPFU	KNOX	GI	F	A	15.3	0.4088	46	2020-11-10	2022-03-11	1.2264	1.6352	7	17.1233	4.28082
EPFU_63_GI	EPFU	KNOX	GI	M	A	11.6	0.8761	47	2019-05-04	2022-03-11	2.6283	3.5044	33	37.6669	9.41673
EPFU_88_GI	EPFU	WILLIAMSON	GI	M	J	9.71	0.6134	47	2020-07-14	2022-03-11	1.8402	2.4536	9	14.6723	3.66808
EPFU_37_GI	EPFU	OBION	GI	F	A	13.8	3.3503	47	2020-05-05	2022-03-11	2.9277	6.278	3	0.895442	0.477859
EPFU_92_GI	EPFU	PUTNAM	GI	M	A	12.813	1.2921	48	2020-07-21	2022-03-11	3.8763	5.1684	11	8.51327	2.12832
EPFU_08_GI	EPFU	SULLIVAN	GI	M	A	10.6007	0.9775	45	2020-07-21	2022-03-11	2.9325	3.91	59	60.3581	15.0895
EPFU_60_GI	EPFU	BLOUNT	GI	M	A	11	0.4712	44	2019-05-14	2022-03-11	1.4136	1.8848	8	16.9779	4.24448
BLANK_18	BLANK	BLANK	BLANK	BLANK	BLANK					2022-03-11	2.2526	2.2526	3		1.33179
BLANK_19	BLANK	BLANK	BLANK	BLANK	BLANK					2022-03-11	2.2526	2.2526	2		0.887863
EPFU_19_GI	EPFU	DAVIDSON	GI	M	A	15.147	0.8739	46	2019-06-10	2022-03-11	2.6217	3.4956	63	72.0906	18.0227

## Sheet: EPFU.mass.R.dat
BatID	Species	County	SampleType	Sex	Age	BatMass	SampleMass	Right FA	Date Collected	Date Digested	KOH Used (g)	SampleandKOHMass	MPCount	MP/GRAM Tissue	MPConc
EPFU_12_GI	EPFU	KNOX	GI	M	J	16.805	1.37	42.5	2020-05-01	2022-01-27	4.11	5.48	23	16.7883	4.19708
EPFU_13_GI	EPFU	HAMILTON	GI	F	J	12.656	0.78	47.5	2020-06-25	2022-01-27	2.34	3.12	1	1.28205	0.320513
EPFU_15_GI	EPFU	HAMILTON	GI	F	U	17.86	1.26	44	2020-06-23	2022-01-27	3.78	5.04	13	10.3175	2.57937
EPFU_85_GI	EPFU	KNOX	GI	F	J	12.3	0.6	47	2019-07-26	2022-02-07	1.8	2.4	34	56.6667	14.1667
EPFU_06_GI	EPFU	SEVIER	GI	F	J	7.85	0.6584	38.5	2020-06-22	2022-02-07	1.97	2.6284	17	25.8202	6.46781
EPFU_89_GI	EPFU	BENTON	GI	F	A	12.41	0.8845	49	2020-09-04	2022-02-07	2.6535	3.538	21	23.7422	5.93556
EPFU_55_GI	EPFU	SULLIVAN	GI	F	J	14.4	0.6587	47	2020-11-13	2022-02-21	1.976	2.6347	15	22.7721	5.69325
EPFU_45_GI	EPFU	SULLIVAN	GI	M	A	17.5	1.0472	45.5	2020-11-05	2022-02-21	3.1416	4.1888	24	22.9183	5.72956
EPFU_87_GI	EPFU	RUTHERFORD	GI	M	A	22.7	1.3893	50	2020-11-21	2022-02-21	4.1679	5.5572	7	5.03851	1.25963
EPFU_18_GI	EPFU	WHITE	GI	M	A	10.055	0.5227	40.5	2019-05-01	2022-02-21	1.5681	2.0908	112	214.272	53.568
EPFU_32_GI	EPFU	HAMILTON	GI	F	A	18.4	2.4259	50	2019-05-08	2022-03-03	7.2777	9.7036	4	1.64887	0.412218
EPFU_43_GI	EPFU	ANDERSON	GI	F	A	14	0.9823	48	2020-08-18	2022-03-03	2.9469	3.9292	21	21.3784	5.3446
EPFU_66_GI	EPFU	GREENE	GI	M	A	13	1.5252	50	2019-04-29	2022-03-03	4.5756	6.1008	4	2.62261	0.655652
EPFU_57_GI	EPFU	HAMILTON	GI	F	A	20.1	2.9272	48	2019-05-08	2022-03-03	8.7816	11.7088	3	1.02487	0.256218
EPFU_67_GI	EPFU	KNOX	GI	F	A	11.5	0.2734	50	2019-08-11	2022-03-03	0.8202	1.0936	6	21.9459	5.48647
EPFU_86_GI	EPFU	PERRY	GI	M	J	13.063	0.9538	45	2020-08-20	2022-03-03	2.8614	3.8152	10	10.4844	2.62109
EPFU_93_GI	EPFU	DAVIDSON	GI	F	A	20.207	1.4714	51	2020-07-20	2022-03-11	4.4373	5.9087	6	4.07775	1.01545
EPFU_07_GI	EPFU	ANDERSON	GI	M	A	11.1919	0.7062	46	2020-05-05	2022-03-11	2.1186	2.8248	60	84.9618	21.2404
EPFU_54_GI	EPFU	KNOX	GI	F	A	15.3	0.4088	46	2020-11-10	2022-03-11	1.2264	1.6352	7	17.1233	4.28082
EPFU_63_GI	EPFU	KNOX	GI	M	A	11.6	0.8761	47	2019-05-04	2022-03-11	2.6283	3.5044	33	37.6669	9.41673
EPFU_88_GI	EPFU	WILLIAMSON	GI	M	J	9.71	0.6134	47	2020-07-14	2022-03-11	1.8402	2.4536	9	14.6723	3.66808
EPFU_37_GI	EPFU	OBION	GI	F	A	13.8	3.3503	47	2020-05-05	2022-03-11	2.9277	6.278	3	0.895442	0.477859
EPFU_92_GI	EPFU	PUTNAM	GI	M	A	12.813	1.2921	48	2020-07-21	2022-03-11	3.8763	5.1684	11	8.51327	2.12832
EPFU_08_GI	EPFU	SULLIVAN	GI	M	A	10.6007	0.9775	45	2020-07-21	2022-03-11	2.9325	3.91	59	60.3581	15.0895
EPFU_60_GI	EPFU	BLOUNT	GI	M	A	11	0.4712	44	2019-05-14	2022-03-11	1.4136	1.8848	8	16.9779	4.24448
EPFU_19_GI	EPFU	DAVIDSON	GI	M	A	15.147	0.8739	46	2019-06-10	2022-03-11	2.6217	3.4956	63	72.0906	18.0227

## Sheet: Summary Table
Row Labels	Count of Sample Type	Sum of MP/GRAM Tissue and KOH	Min of MP/GRAM Tissue and KOH2	Max of MP/GRAM Tissue and KOH2
BLANK	10	11.5876	0.387747	2.02703
GI	26	194.278	0.256218	53.568
(blank)
Grand Total	36	205.866	0.256218	53.568
Summary table of microplastics (MPs) found in the gastrointestinal tracts of big brown bats in Tennessee, USA and procedural blanks (i.e. control samples).
Sample type	MP count (mean + sd)	Total count (range)	MP conc (mean + sd)	Total conc (range)
GI tracts	22.1 +- 25.6	574 (1-112)	7.5 +-10.9	194.3 (0.3-54.6)
Blanks	2.8 +- 1.7	28 (1-6)	1.2 +- 0.5	11.6 (0.4-2.0)
Sex	Juvenile	Adult	Unknown	All
Male	3.5 ± 0.8 (3)	13.1 ± 16.0 (10)		10.9 ± 14.5 (13)
Female	6.7 ± 5.7 (4)	2.9 ± 2.6 (8)	2.6 (1)	4.0 ± 3.9 (13)
All	5.3 ± 4.4 (7)	8.6 ± 12.8 (18)	2.6 (1)
